# Supplementary material for: The anti-inflammatory Annexin A1 induces the clearance and degradation of the amyloid-β peptide
Source: PubMed Central journal article supplement (PMC5010757; doi:10.1186/s12974-016-0692-6), 2016-09-02

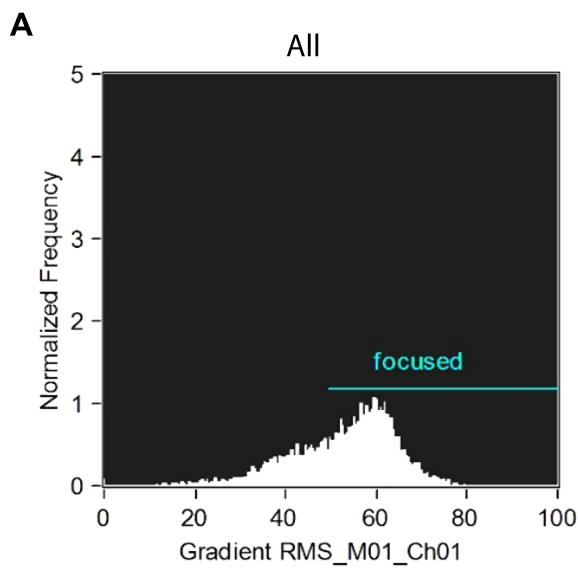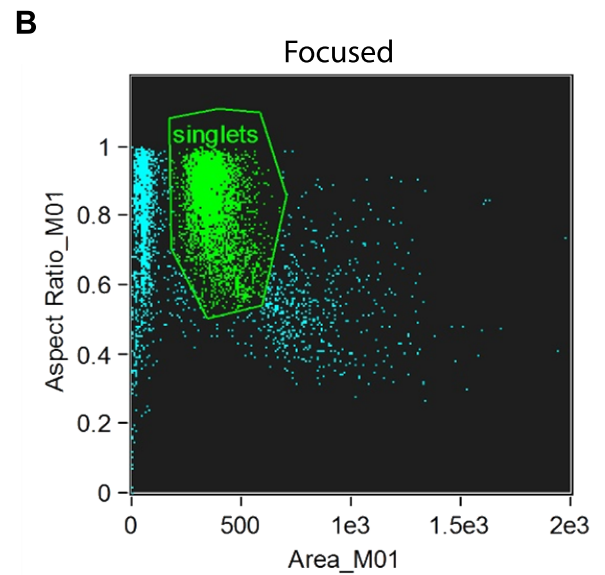

**C**

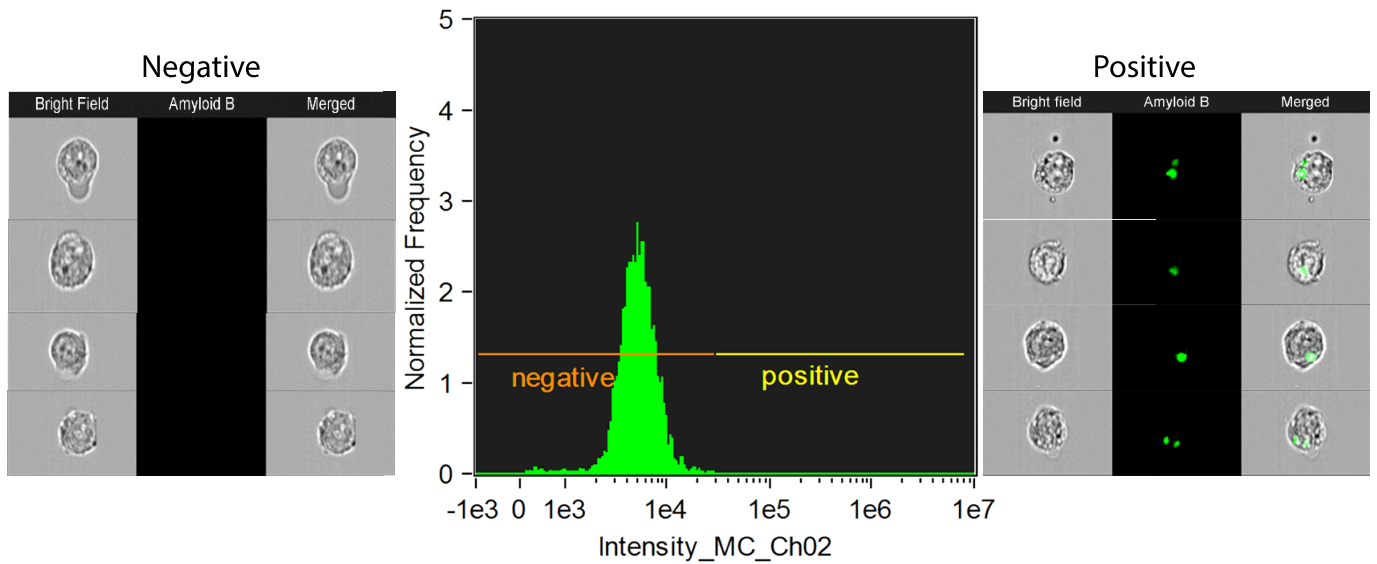

Intensity\_MC\_Ch02

| Population                    | Count | %Gated |
|-------------------------------|-------|--------|
| singlets & focused            | 5008  | 100    |
| negative & singlets & focused | 5006  | 100    |
| positive & singlets & focused | 0     | 0      |

**D**

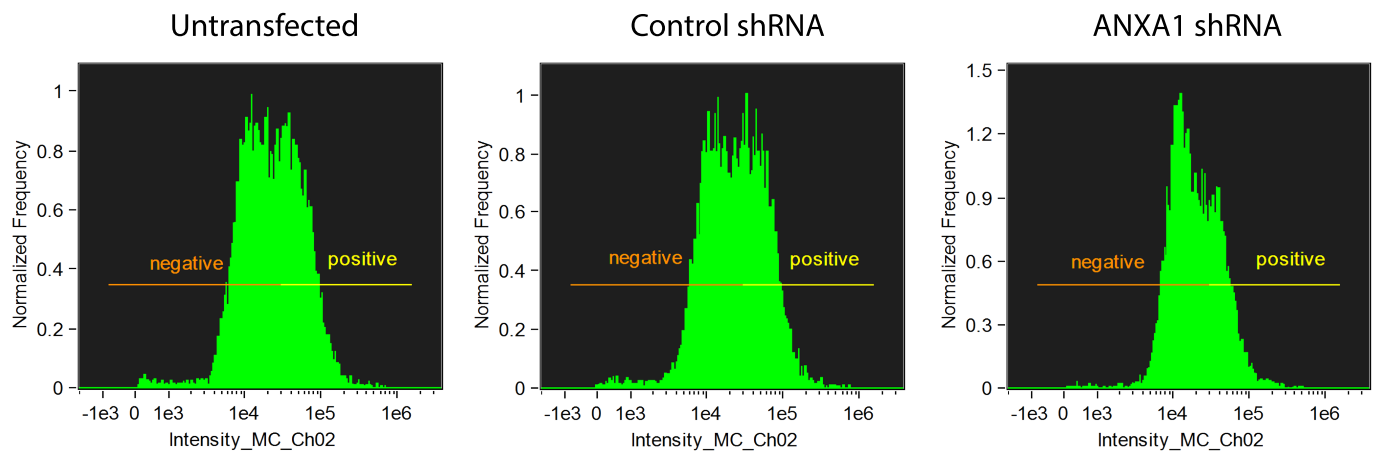

Supplement: 12974_2016_692_MOESM3_ESM.pdf [file 12974_2016_692_MOESM3_ESM.pdf]
