# Supplementary material for: The anti-inflammatory Annexin A1 induces the clearance and degradation of the amyloid-β peptide
Source: PubMed Central journal article supplement (PMC5010757; doi:10.1186/s12974-016-0692-6), 2016-09-02

**A**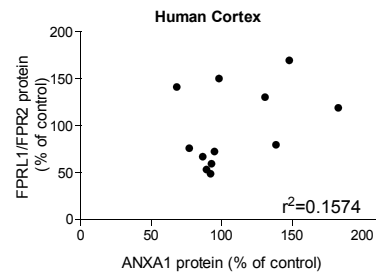**B**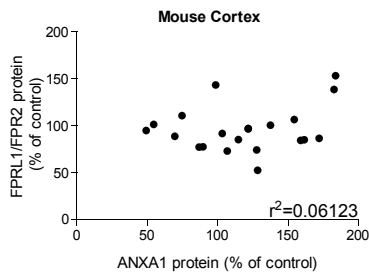**C**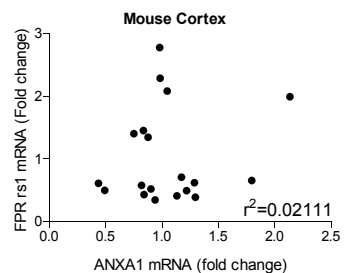**D**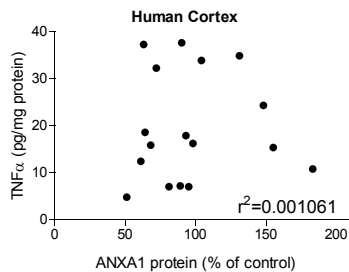**E**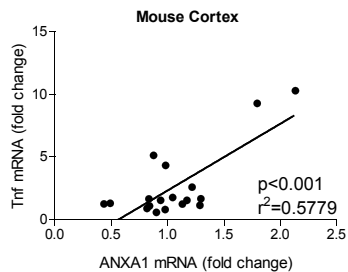**F**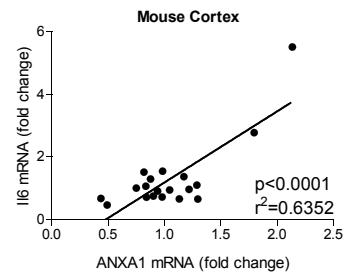**G**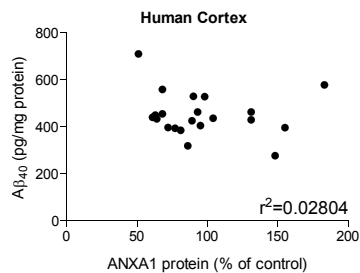**H**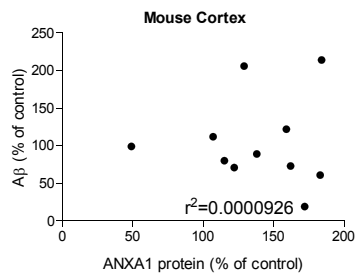

Supplement: 12974_2016_692_MOESM5_ESM.pdf [file 12974_2016_692_MOESM5_ESM.pdf]
