# Supplementary material for: The anti-inflammatory Annexin A1 induces the clearance and degradation of the amyloid-β peptide
Source: Springer Nature journal article supplement (doi:10.1186/s12974-016-0692-6), 2016-09-02

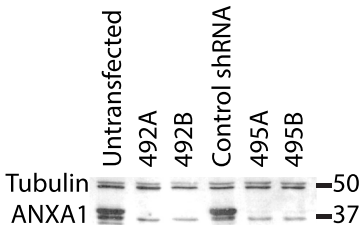

**ANXA1**

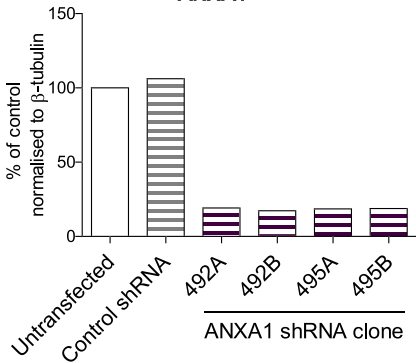

Supplement: MOESM1 [file 10645572]
